# Supplementary material
Source: Springer Nature journal article supplement (https://www.springermedizin.de/resource/supplementary/13229_2012_67_MOESM2_ESM.pdf/9676090)
Supplement: MOESM2 [file 9676090]

|                   |       |       |       |       |       |       |       |       |       |       |       |       |       |       |       |       |       |       |       |       |       |       |       |       |       |       |       |       |       |       |       |       |       |             |             |            |
|-------------------|-------|-------|-------|-------|-------|-------|-------|-------|-------|-------|-------|-------|-------|-------|-------|-------|-------|-------|-------|-------|-------|-------|-------|-------|-------|-------|-------|-------|-------|-------|-------|-------|-------|-------------|-------------|------------|
| Maltose           | 0.98  | 1.04  | 0.18  | 1.36  | 1.07  | 1.35  | 1.40  | 1.06  | 0.95  | 0.23  | 0.89  | 1.08  | 1.43  | 1.44  | 1.01  | 1.11  | 1.25  | 1.16  | 0.26  | 1.28  | 1.27  | 0.86  | 1.13  | -0.09 | 0.15  | 1.24  | 0.75  | 0.63  | 0.99  | 0.51  | 0.89  | 0.84  | -3.05 | 0.72        | 1.17        | 1.02498186 |
| Val-His           | -1.34 | -1.65 | -2.71 | -2.68 | -3.34 | -2.63 | -2.53 | -3.44 | -1.20 | -1.82 | -1.82 | -2.53 | -2.00 | -1.78 | -0.96 | -1.68 | -2.81 | -3.74 | -3.21 | -3.64 | -3.13 | -2.97 | -2.38 | -3.08 | -1.71 | -1.69 | -1.33 | -3.44 | -2.01 | -1.59 | -1.33 | -2.58 | -2.99 | 2.86        | 1.25700781  |            |
| Homoserine        | -2.31 | -1.79 | -2.37 | -1.92 | -2.88 | -2.58 | -2.43 | -1.78 | -1.45 | -1.18 | -1.72 | -2.43 | -1.73 | -1.75 | -1.64 | -1.17 | -1.17 | -1.74 | -2.66 | -2.90 | -2.88 | -2.45 | -2.83 | -1.51 | -2.70 | -2.13 | -1.93 | -1.89 | -3.68 | -1.60 | -1.71 | -1.29 | -2.41 | -2.72       | 0.31269756  |            |
| Val-Pro           | -1.46 | -2.06 | -2.79 | -2.98 | -3.64 | -2.51 | -2.72 | -3.54 | -1.16 | -2.05 | -2.05 | -2.27 | -2.04 | -1.83 | -1.15 | -1.61 | -2.88 | -3.64 | -3.38 | -3.64 | -3.27 | -3.10 | -1.30 | -2.94 | -1.99 | -2.31 | -1.29 | -3.70 | -1.99 | -2.15 | -1.35 | -3.40 | -3.22 | -2.92       | 0.12978557  |            |
| Adenosine         | 0.74  | 0.87  | 1.06  | 1.21  | 1.35  | 1.16  | 1.17  | 0.79  | 1.40  | 0.04  | 0.54  | 0.24  | 0.86  | 0.96  | 0.03  | 0.62  | 0.48  | 1.09  | 0.01  | 0.95  | 1.74  | 1.02  | 0.49  | 1.99  | 0.31  | 1.03  | 0.85  | 0.76  | 1.11  | 0.52  | 0.40  | 0.58  | 0.40  | 0.33        | 0.13271773  |            |
| Val-Val           | -1.51 | -1.68 | -3.04 | -3.11 | -3.76 | -2.81 | -2.74 | -3.61 | -1.76 | -2.64 | -2.61 | -2.74 | -2.61 | -2.03 | -1.03 | -1.41 | -3.22 | -3.43 | -3.82 | -3.35 | -2.74 | -3.05 | -1.77 | -2.40 | -3.16 | -1.87 | -2.45 | -1.85 | -1.19 | -1.55 | -1.34 | 0.02  | 0.21  | 0.65        | 0.13291773  |            |
| Tyrosine          | -2.33 | -1.61 | -2.22 | -2.51 | -3.56 | -2.54 | -2.71 | -2.81 | -1.37 | -2.11 | -2.35 | -2.13 | -1.92 | -1.98 | -2.79 | -1.61 | -1.49 | -2.59 | -3.52 | -3.72 | -3.72 | -3.13 | -2.09 | -2.99 | -2.18 | -2.61 | -2.42 | -2.39 | -1.81 | -1.67 | -1.29 | -2.63 | -2.63 | 0.261312599 |             |            |
| His-Thr           | -1.25 | -1.37 | -1.47 | -1.55 | -3.13 | -1.56 | -1.32 | -1.93 | -0.99 | -1.34 | -1.34 | -1.70 | -0.49 | -0.58 | -1.73 | -1.64 | -0.68 | -0.87 | -2.47 | -1.81 | -2.19 | -1.47 | -1.01 | -1.11 | -1.51 | -2.12 | -1.35 | -0.85 | -1.13 | -1.76 | -0.85 | -1.72 | -0.65 | -1.26       | -1.83       | 0.13325520 |
| Ile-Gly           | -3.51 | -2.14 | -2.56 | -2.24 | -3.56 | -2.43 | -2.47 | -3.16 | -1.22 | -2.05 | -2.05 | 2.20  | 2.20  | 2.20  | 2.20  | 2.20  | 2.20  | 2.20  | 2.20  | 2.20  | 2.20  | 2.20  | 2.20  | 2.20  | 2.20  | 2.20  | 2.20  | 2.20  | 2.20  | 2.20  | 2.20  | 2.20  | 2.20  | 2.20        | 1.3428212   |            |
| Sorbitol          | -2.09 | -1.43 | -2.56 | -1.47 | -3.04 | -2.73 | -2.06 | -2.11 | -1.25 | -1.80 | -1.60 | 2.25  | -1.89 | -1.43 | -2.06 | -0.81 | -0.89 | -1.18 | -3.31 | -3.12 | -3.57 | -2.40 | -2.24 | -1.69 | -2.40 | -1.66 | -1.87 | -2.00 | -1.74 | -1.72 | -1.40 | -0.86 | -3.40 | -1.20       | -1.87       | 1.3479594  |
| Serine            | -2.52 | -1.87 | -2.15 | -1.34 | -2.80 | -2.40 | -2.66 | -2.40 | -1.35 | -2.25 | -1.82 | -2.44 | -2.08 | -1.99 | -1.92 | -1.34 | -1.41 | -1.92 | -2.86 | -3.35 | -3.59 | -3.02 | -3.27 | -1.70 | -2.80 | -2.61 | -1.81 | -1.12 | -1.73 | -1.70 | -1.69 | -1.25 | -2.63 | -2.05       | 0.213547829 |            |
| Thymidine         | -0.64 | -1.47 | -1.40 | -1.19 | -1.82 | -1.03 | -0.65 | -1.54 | -2.60 | -3.15 | -2.17 | -3.22 | -1.86 | -1.96 | -1.56 | -1.03 | -2.66 | -0.87 | -2.03 | -1.27 | -1.61 | -1.45 | -1.18 | -1.69 | -1.99 | -0.66 | -0.33 | -1.12 | -0.67 | -0.72 | -0.52 | -1.54 | -2.44 | 0.57        | 0.213732318 |            |
| Ile-Pro           | -3.08 | -1.90 | -2.60 | -1.84 | -3.44 | -2.51 | -2.34 | -3.02 | -1.15 | -1.67 | -1.67 | 1.16  | 1.87  | 3.27  | -1.18 | -1.52 | -1.63 | -2.39 | -3.49 | -3.69 | -3.68 | -3.16 | -2.94 | -1.44 | -2.73 | -2.14 | -2.47 | -1.82 | -2.97 | -2.37 | -1.61 | -1.13 | -2.43 | -2.43       | 0.83871120  |            |
| Ile-Ala           | -2.01 | -1.81 | -2.43 | -1.79 | -3.21 | -2.33 | -2.40 | -2.62 | -1.33 | -1.78 | -1.78 | 2.57  | 1.91  | -2.03 | -2.13 | -1.47 | -1.70 | -1.99 | -3.13 | -3.44 | -3.74 | -2.95 | -3.02 | -1.87 | -2.84 | -2.02 | -2.42 | -2.20 | -1.87 | -1.86 | -1.62 | -2.34 | -2.37 | -2.39       | 1.04395550  |            |
| Lys-Ser           | -2.38 | -1.81 | -2.69 | -2.28 | -3.17 | -2.75 | -2.64 | -3.04 | -1.66 | 2.10  | 2.10  | 2.83  | 2.20  | 2.16  | 2.01  | 1.41  | 1.41  | 2.13  | 3.49  | 3.51  | 4.06  | -2.62 | -2.29 | 2.97  | 2.45  | 1.95  | 1.99  | 2.86  | -2.27 | -1.43 | -1.73 | -3.68 | -2.52 | -2.56       | 1.45676808  |            |
| Met-Gly           | -3.08 | -1.60 | -2.99 | -2.70 | -3.44 | -2.70 | -2.67 | -3.72 | -1.31 | -2.34 | -2.34 | 2.20  | 2.87  | 2.51  | 2.82  | 2.49  | 2.15  | 2.86  | 3.56  | 3.31  | 3.72  | 3.94  | -3.17 | 1.94  | 2.99  | 3.12  | -3.04 | -2.07 | -3.37 | -1.11 | -2.27 | -3.71 | -2.80 | -3.40       | 0.44692002  |            |
| Val-Met           | -1.15 | -2.02 | -3.15 | -2.29 | -3.24 | -2.56 | -2.74 | -3.78 | -1.54 | -2.16 | -2.16 | 2.68  | 2.40  | 2.02  | 1.92  | 1.46  | -1.88 | -2.56 | -3.31 | -3.72 | -3.94 | -3.17 | -2.99 | -1.67 | -3.04 | -2.40 | -1.86 | -1.78 | -3.38 | -1.81 | -1.59 | -1.56 | -3.30 | -2.99       | 1.14727041  |            |
| Thr-Asp           | -2.82 | -1.81 | -2.77 | -1.99 | -3.51 | -2.73 | -2.77 | -3.16 | -1.28 | -1.92 | -1.92 | 2.71  | 2.03  | 1.95  | -2.29 | -1.49 | -1.45 | -2.20 | -3.59 | -3.41 | -3.64 | -3.32 | -3.13 | -2.19 | -3.32 | -3.28 | -2.17 | -2.54 | -2.67 | -2.00 | -1.16 | -1.42 | -3.17 | -2.90       | 0.71476693  |            |
| Tyr-Lys           | -0.67 | -1.85 | -1.28 | -1.65 | -2.65 | -1.89 | -1.54 | -1.86 | -1.55 | -1.82 | -1.82 | 3.27  | 1.12  | -1.23 | -1.49 | -1.28 | -1.37 | -1.34 | -2.95 | -2.51 | -2.84 | -1.93 | -1.38 | -1.37 | -2.06 | -1.00 | -2.01 | -1.21 | -2.36 | -1.82 | -1.09 | -1.87 | -3.00 | -1.26       | 2.27        | 0.14749341 |
| Threonine         | -2.82 | -1.75 | -2.46 | -1.91 | -2.92 | -2.49 | -2.55 | -2.24 | -1.36 | -2.06 | -1.87 | 2.36  | 2.01  | -1.77 | -1.93 | -1.48 | -1.31 | -2.20 | -3.22 | -3.34 | -3.51 | -3.29 | -3.07 | -1.53 | -2.93 | -2.12 | -2.33 | -0.88 | -2.16 | -1.83 | -1.73 | -3.00 | -2.87 | -2.34       | 1.50489682  |            |
| Ala-Ile           | -0.88 | -1.87 | -2.40 | -1.83 | -2.67 | -2.28 | -1.99 | -2.81 | -1.42 | -2.54 | -1.88 | -2.51 | -1.97 | -2.20 | -1.96 | -1.28 | -1.47 | -1.56 | -2.91 | -4.13 | -4.26 | -4.13 | -2.46 | -2.13 | -2.53 | -2.16 | -2.92 | -1.63 | -1.45 | -1.98 | -2.03 | -1.77 | -1.83 | -2.50       | 0.214903186 |            |
| Ala-His           | -2.10 | -2.02 | -2.44 | -1.94 | -2.77 | -2.35 | -2.26 | -2.66 | -1.65 | -2.55 | -1.84 | -2.07 | -2.18 | -2.29 | -2.15 | -1.23 | -1.37 | -1.99 | -3.08 | -3.41 | -3.74 | -3.20 | -3.28 | -1.84 | -3.29 | -2.03 | -2.10 | -1.60 | -1.42 | -1.16 | -2.36 | -1.86 | -3.10 | -2.24       | 0.15945105  |            |
| Lactic Acid       | -0.23 | -1.39 | -1.68 | -0.95 | -1.14 | -0.42 | -0.72 | -1.25 | -0.82 | -1.74 | -1.11 | 2.05  | 1.10  | 1.40  | 0.80  | 0.07  | 0.20  | 0.05  | 0.11  | 0.01  | 0.29  | 0.12  | 0.50  | -1.65 | -0.77 | -0.28 | -0.33 | -0.04 | -0.18 | -0.16 | -0.30 | 0.64  | 0.23  | 0.13        | 0.61        | 0.16012946 |
| Asp-Lys           | -1.96 | -1.97 | -2.58 | -2.12 | -3.34 | -2.60 | -2.74 | -2.70 | -2.22 | -2.18 | -1.95 | 2.35  | -1.84 | -2.02 | -2.47 | -1.80 | -2.67 | -3.35 | -3.44 | -3.84 | -3.18 | -2.87 | -1.55 | -2.78 | -2.10 | -3.08 | -1.39 | -2.59 | -1.51 | -1.88 | -1.31 | -3.34 | -2.21 | -2.82       | 0.68370357  |            |
| Ser-Ser           | -3.13 | -1.87 | -2.29 | -1.68 | -2.37 | -2.87 | -2.41 | -2.66 | -1.40 | -1.66 | -1.66 | 2.55  | 1.96  | 1.86  | 1.78  | 1.55  | 1.41  | -1.83 | -2.66 | -3.31 | -3.57 | -3.21 | -3.24 | -1.83 | -3.10 | -2.16 | -2.82 | -2.40 | -1.97 | -1.34 | -1.51 | -2.69 | -1.99 | -2.39       | 1.34484840  |            |
| Glutamic Acid     | -2.53 | -2.18 | -2.73 | -2.81 | -3.38 | -2.51 | -2.21 | -3.08 | -1.63 | -2.21 | -2.03 | 2.27  | 1.76  | 1.57  | 1.27  | 1.32  | 1.27  | 3.25  | 3.44  | 3.64  | -3.18 | -3.17 | -1.63 | -3.27 | -2.72 | -2.49 | -1.52 | -2.29 | -1.78 | -1.79 | -3.29 | -2.80 | -2.90 | -2.42       | 0.17657896  |            |
| Ser-Asn           | -2.22 | -1.78 | -2.13 | -1.49 | -3.15 | -2.41 | -2.51 | -2.72 | -1.22 | -1.76 | -1.76 | 2.41  | -1.86 | -2.03 | -1.45 | -1.43 | -1.76 | -2.93 | -3.44 | -3.54 | -3.32 | -3.27 | -1.48 | -2.90 | -1.70 | -1.69 | -1.33 | -2.02 | -1.94 | -1.46 | -1.17 | -2.53 | -1.97 | -2.21       | 0.17665337  |            |
| Thr-Phe           | -2.56 | -2.40 | -3.15 | -2.03 | -3.22 | -2.79 | -2.54 | -3.37 | -2.32 | -2.51 | -2.51 | 3.35  | 3.00  | 2.73  | -2.03 | -1.83 | -2.47 | -3.26 | -3.27 | -3.61 | -3.66 | -3.28 | -3.29 | -2.17 | -3.66 | -2.40 | -2.45 | -2.43 | -3.12 | -3.24 | -1.87 | -1.83 | -3.63 | -2.95       | 3.20        | 0.17768100 |
| Thr-Arg           | -2.41 | -1.91 | -2.67 | -2.10 | -3.63 | -2.60 | -2.61 | -3.11 | -1.62 | -2.01 | -2.01 | 3.02  | 2.36  | 2.27  | -2.40 | -1.73 | -1.85 | -2.09 | -3.41 | -3.68 | -4.01 | -3.51 | -3.32 | -1.92 | -3.28 | -1.94 | -1.95 | -1.41 | -2.69 | -2.08 | -1.79 | -1.63 | -3.28 | -2.87       | 1.07889944  |            |
| Glut-Gly          | -2.09 | -1.81 | -2.87 | -2.10 | -3.54 | -2.60 | -2.62 | -3.25 | -1.47 | -2.01 | -2.18 | 2.16  | 2.60  | -2.57 | -1.63 | -1.40 | -2.75 | -3.14 | -3.47 | -3.84 | -2.46 | -2.18 | -2.56 | -2.77 | -2.95 | -2.71 | -1.67 | -1.32 | -1.80 | -1.83 | -2.86 | -3.52 | -3.80 | -2.80       | 0.18084051  |            |
| Acetylmannosamine | 0.56  | -1.83 | -2.83 | -0.33 | -3.43 | -2.47 | -2.10 | -2.40 | -1.33 | -2.21 | -1.83 | -2.40 | -1.97 | -1.75 | -2.50 | -1.69 | -1.19 | -2.40 | -3.07 | -3.07 | -3.24 | -2.87 | -2.82 | -3.13 | -2.90 | -1.54 | -2.70 | -2.22 | -2.63 | -1.92 | -1.37 | -0.97 | -2.53 | -2.27       | 1.01826655  |            |
| Histidine         | -2.20 | -1.66 | -2.45 | -1.95 | -3.70 | -3.01 | -2.69 | -2.72 | -1.43 | -2.24 | -1.84 | -2.49 | -1.84 | -1.72 | -2.23 | -1.50 | -1.24 | -2.40 | -3.02 | -3.49 | -3.78 | -3.37 | -3.13 | -1.95 | -2.90 | -2.01 | -2.56 | -2.14 | -3.10 | -1.99 | -1.77 | -1.17 | -2.73 | -2.78       | 0.18260205  |            |
| Phe-Gly           | -2.25 | -2.47 | -2.98 | -2.94 | -3.38 | -2.80 | -2.64 | -3.44 | -2.30 | -2.78 | -2.35 | 3.02  | 2.61  | 2.61  | 2.12  | -2.52 | -2.85 | -3.46 | -3.28 | -3.59 | -3.10 | -3.88 | -2.45 | -3.56 | -2.46 | -2.32 | -3.30 | -3.05 | -2.57 | -2.22 | -1.84 | -3.92 | -3.10 | -3.23       | 0.18225771  |            |
| Thr-Pro           | -1.81 | -1.73 | -2.71 | -1.71 | -3.46 | -2.51 | -2.78 | -2.56 | -1.20 | -1.82 | -1.82 | 2.51  | 2.03  | 1.97  | -2.01 | -1.76 | -1.69 | -2.37 | -3.46 | -3.41 | -3.78 | -3.18 | -3.06 | -2.11 | -2.55 | -1.98 | -2.54 | -1.60 | -1.88 | -1.58 | -1.37 | -2.98 | -2.53 | -2.80       | 0.18260184  |            |
| Val-Ser           | -2.36 | -2.06 | -2.74 | -1.78 | -3.70 | -2.87 | -2.89 | -2.66 | -1.26 | -2.30 | -2.38 | 3.03  | 2.86  | 1.76  | 1.45  | 1.41  | -1.83 | -2.66 | -3.31 | -3.57 | -3.21 | -3.24 | -1.83 | -3.10 | -2.16 | -2.82 | -2.40 | -1.97 | -1.34 | -1.51 | -2.69 | -1.99 | -2.39 | 1.03175440  |             |            |
| Phe-Phe           | -2.74 | -2.37 | -3.32 | -2.91 | -3.54 | -2.92 | -2.93 | -3.60 | -2.43 | -2.69 | -2.69 | 3.15  | 1.10  | 2.86  | 2.86  | 0.06  | 2.62  | 2.63  | 3.41  | 3.64  | -3.83 | -3.29 | -3.21 | -1.69 | -3.52 | -2.80 | -3.49 | -2.70 | -3.31 | -2.60 | -1.91 | -3.74 | -3.59 | -3.40       | 0.19042876  |            |
| Met-Gly           | -2.63 | -1.76 | -2.77 | -1.85 | -3.06 | -2.54 | -2.81 | -3.02 | -1.64 | -2.09 | -2.08 | 2.85  | 2.22  | 2.51  | -1.14 | -1.58 | -1.88 | -3.22 | -3.66 | -3.86 | -3.01 | -1.98 | -3.04 | -2.00 | -1.92 | -2.19 | -2.98 | -1.65 | -1.77 | -1.33 | -3.52 | -2.06 | -2.54 | 0.19075543  |             |            |

|                 |       |       |       |       |       |       |       |       |       |       |       |       |       |       |       |       |       |       |       |       |       |       |       |       |       |       |       |       |       |       |       |       |            |       |            |             |
|-----------------|-------|-------|-------|-------|-------|-------|-------|-------|-------|-------|-------|-------|-------|-------|-------|-------|-------|-------|-------|-------|-------|-------|-------|-------|-------|-------|-------|-------|-------|-------|-------|-------|------------|-------|------------|-------------|
| Gln-Gly         | 0.65  | -0.59 | -1.18 | -0.07 | -3.16 | -2.21 | -1.96 | -3.59 | 2.66  | 2.74  | -3.01 | -3.28 | -2.53 | -2.15 | -2.13 | -2.21 | -2.46 | -2.71 | -2.29 | -2.06 | -3.74 | -1.70 | -1.75 | -1.28 | -0.75 | -1.86 | -3.22 | -0.57 | -1.22 | -0.94 | -1.20 | -2.88 | -2.90      | 2.46  | 3.02       | 0.425538993 |
| Thr-Met         | -3.07 | -2.18 | -2.91 | -2.18 | -2.34 | -2.54 | -2.63 | -3.27 | -1.66 | 2.14  | -2.14 | -3.06 | -2.28 | -2.23 | -1.91 | -3.17 | -1.92 | -1.19 | -2.87 | -3.51 | -3.70 | -3.07 | -3.05 | -2.06 | -2.63 | -2.14 | -1.88 | -1.59 | -2.84 | -1.92 | -1.90 | -1.50 | -3.25      | 2.43  | 2.84       | 0.43079478  |
| Glucose-1-P     | -3.09 | -2.01 | -1.58 | -1.17 | -3.31 | -1.74 | -0.81 | -1.98 | 0.80  | -1.65 | -1.50 | -1.72 | -0.50 | 0.99  | -1.14 | -0.72 | -0.67 | -1.18 | -2.47 | -2.32 | -3.44 | -2.25 | -1.20 | -0.70 | -2.32 | -0.96 | -1.36 | -1.33 | -1.14 | -1.36 | -4.47 | -1.02 | -1.82      | -1.26 | 1.74       | 0.43139934  |
| Lactulose       | -1.12 | -1.75 | -2.83 | -2.36 | -3.47 | -2.88 | -1.60 | -2.59 | -1.35 | -2.29 | -1.92 | -2.24 | -2.06 | -2.02 | -1.15 | -1.67 | -1.49 | -2.46 | -3.46 | -3.81 | -3.68 | -3.20 | -1.55 | -1.84 | -2.81 | -1.91 | -2.36 | -2.07 | -2.61 | -2.01 | -1.04 | -1.13 | -2.68      | -2.46 | 2.05       | 0.43055133  |
| Leu-Pro         | -1.25 | -2.05 | -2.24 | -2.01 | -2.03 | -1.72 | -2.25 | -1.33 | -1.71 | -1.71 | -2.73 | -1.97 | -2.05 | -1.72 | -0.91 | -1.62 | -1.29 | -1.94 | -2.86 | -3.38 | -3.68 | -2.19 | -1.84 | -1.16 | -2.86 | -1.58 | -1.21 | -1.79 | -0.89 | -1.61 | -1.10 | -1.42 | -2.29      | -1.22 | 2.22       | 0.43686022  |
| Ser-Met         | -3.28 | -2.06 | -2.89 | -2.06 | -3.01 | -2.70 | -3.02 | -2.93 | -1.87 | -2.34 | 2.91  | -2.47 | -2.43 | -1.96 | -1.42 | -1.94 | -2.98 | -3.24 | -3.51 | -3.64 | -3.27 | -3.17 | -2.38 | -2.77 | -2.04 | -1.79 | -1.27 | -2.65 | -2.08 | -2.15 | -1.81 | -3.21 | -2.24      | 2.66  | 0.43740592 |             |
| Sorbose         | -1.14 | -1.97 | -2.54 | -3.57 | -3.22 | -2.63 | -1.00 | -2.33 | -1.37 | -2.31 | -1.84 | -2.58 | -1.86 | -1.85 | -1.74 | -1.37 | -1.47 | -2.16 | -3.49 | -3.24 | -3.29 | -2.71 | -1.56 | -1.40 | -2.48 | -2.18 | -2.54 | -1.22 | -2.47 | -2.22 | -2.33 | -1.29 | -2.06      | 2.26  | 2.40       | 0.43788361  |
| Rhamnose        | -1.28 | -1.89 | -2.64 | -2.10 | -3.31 | -2.47 | -1.65 | -2.40 | -1.37 | -2.05 | -1.84 | -1.89 | -1.80 | -1.40 | -1.46 | -2.40 | -3.54 | -2.83 | -3.51 | -2.46 | -1.49 | -0.97 | -2.79 | -1.87 | -2.22 | -1.72 | -2.53 | -1.37 | -1.29 | -1.71 | -2.24 | -2.34 | 0.43795587 |       |            |             |
| Ile-Pro         | -3.22 | -2.12 | -2.72 | -2.22 | -3.32 | -2.82 | -2.81 | -3.80 | -1.89 | -2.27 | -2.27 | -2.05 | -2.75 | -2.75 | -2.65 | -2.18 | -2.30 | -2.59 | -3.49 | -3.51 | -3.63 | -3.17 | -3.23 | -3.24 | -3.40 | -2.88 | -2.43 | -2.24 | -2.93 | -2.31 | -2.10 | -1.48 | -2.10      | -3.18 | 3.21       | 0.43240287  |
| Pro-Phle        | -3.12 | -1.96 | -2.81 | -1.87 | -3.64 | -2.54 | -2.47 | -3.37 | -1.22 | -2.02 | -2.02 | -3.74 | -2.63 | -2.60 | -1.80 | -1.81 | -2.59 | -3.92 | -3.54 | -4.04 | -3.44 | -3.08 | -1.95 | -2.46 | -2.40 | -3.11 | -1.53 | -1.37 | -1.81 | -2.13 | -2.14 | -3.25 | -0.45      | 1.61  | 2.84       | 0.44561849  |
| Ala-Met         | -2.31 | -2.29 | -2.07 | -2.46 | -2.82 | -2.51 | -2.70 | -3.18 | -1.95 | -2.50 | -2.42 | -3.24 | -2.40 | -2.55 | -1.28 | -1.30 | -1.41 | -2.02 | -2.70 | -3.05 | -3.78 | -2.56 | -2.66 | -2.24 | -2.97 | -2.63 | -1.99 | -1.97 | -2.87 | -1.96 | -1.56 | -1.86 | -3.44      | -2.76 | 3.27       | 0.44716849  |
| Glucuronic Acid | 0.52  | -1.92 | -2.71 | -2.18 | -3.22 | -2.45 | -2.31 | -2.61 | -1.57 | -2.41 | -2.03 | -2.56 | -2.02 | -2.04 | -2.51 | -1.65 | -1.43 | -2.27 | -3.31 | -3.06 | -3.40 | -3.00 | -2.40 | -1.14 | -2.49 | -2.24 | -2.68 | -1.50 | -2.43 | -2.33 | -1.01 | -1.44 | -1.96      | -1.89 | 2.32       | 0.44755970  |
| Asp-Asp         | -3.06 | -1.95 | -2.86 | -2.47 | -3.61 | -2.85 | -2.84 | -2.85 | -1.58 | -2.10 | -1.84 | -2.45 | -1.97 | -2.20 | -2.26 | -1.38 | -2.25 | -2.02 | -2.78 | -2.92 | -4.01 | -2.27 | -1.94 | -2.44 | -2.27 | -2.46 | -2.17 | -1.79 | -2.71 | -2.13 | -1.60 | -1.46 | -3.88      | -2.91 | 3.21       | 0.45413770  |
| Methylglyoxal   | -1.85 | -1.98 | -2.77 | -1.67 | -3.35 | -2.64 | -1.48 | -2.66 | -1.51 | -2.23 | -1.94 | -2.57 | -1.88 | -1.93 | -2.27 | -1.53 | -1.57 | -2.13 | -3.24 | -3.57 | -3.28 | -2.65 | -1.33 | -2.85 | -2.23 | -2.73 | -3.17 | -2.18 | -2.22 | -1.03 | -2.07 | -2.09 | -2.25      | -2.29 | 0.45588007 |             |
| Fucose          | -0.61 | -1.87 | -2.77 | -1.93 | -3.27 | -2.47 | -0.87 | -2.33 | -1.76 | -2.20 | -1.73 | -2.46 | -1.99 | -2.01 | -1.69 | -1.35 | -1.53 | -2.27 | -3.21 | -3.13 | -3.46 | -2.56 | -1.37 | -0.95 | -2.57 | -1.63 | -2.29 | -1.86 | -2.33 | -1.89 | -0.97 | -1.06 | -2.13      | -2.15 | 0.45608190 |             |
| Succinic Acid   | -2.93 | -1.30 | -1.96 | -1.63 | -3.06 | -2.62 | -0.94 | -2.27 | -0.60 | -1.68 | -2.51 | -1.66 | -1.69 | -1.55 | -2.34 | -1.63 | -1.45 | -2.26 | -2.74 | -3.05 | -1.95 | -2.05 | -1.10 | -2.13 | -1.11 | -2.56 | -0.61 | -0.51 | -1.65 | -0.75 | -0.13 | -2.26 | -1.06      | 2.16  | 0.45705384 |             |
| Malic Acid      | -0.86 | -1.86 | -2.71 | -2.53 | -3.22 | -3.29 | -2.77 | -3.05 | -1.36 | -2.22 | -2.17 | -2.34 | -2.09 | -2.36 | -1.42 | -1.28 | -2.51 | -3.31 | -2.51 | -3.38 | -1.99 | -1.95 | -1.82 | -2.89 | -1.63 | -2.65 | -1.13 | -1.54 | -1.94 | -0.94 | -0.77 | -2.63 | -1.63      | 2.14  | 0.45720935 |             |
| Ile-Ile         | -3.01 | -4.92 | -2.89 | -2.43 | -2.92 | -2.51 | -2.38 | -3.59 | -1.10 | -1.61 | -1.61 | -2.10 | -1.87 | -2.37 | -2.55 | -1.45 | -1.29 | -2.11 | -3.00 | -3.64 | -3.80 | -2.70 | -2.50 | -2.63 | -2.31 | -2.17 | -2.37 | -2.15 | -3.40 | -1.83 | -1.50 | -1.14 | -3.08      | -3.41 | 2.38       | 0.47396467  |
| Pro-Pro         | -3.17 | -1.82 | -2.85 | -2.44 | -3.41 | -2.55 | -2.81 | -3.34 | -1.25 | -1.86 | -1.86 | -2.34 | -1.22 | -2.14 | -2.04 | -1.67 | -1.85 | -1.93 | -3.41 | -3.12 | -3.56 | -2.74 | -2.65 | -1.79 | -2.15 | -1.97 | -1.95 | -1.80 | -2.56 | -2.28 | -1.55 | -1.53 | -3.17      | -2.66 | 2.87       | 0.47301511  |
| Methyl Glucose  | -1.97 | -1.61 | -2.47 | -1.79 | -2.97 | -3.06 | -1.78 | -3.13 | -1.10 | -1.86 | -1.49 | -2.10 | -1.71 | -1.70 | -1.95 | -1.17 | -1.22 | -1.89 | -2.28 | -3.05 | -3.12 | -2.52 | -2.48 | -0.95 | -2.24 | -1.53 | -2.40 | -1.64 | -1.65 | -1.87 | -0.83 | -0.36 | -2.90      | -2.50 | -1.91      | 0.47324557  |
| Pro-Phle        | -1.49 | -2.09 | -2.30 | -1.61 | -2.24 | -1.79 | -1.86 | -2.43 | -1.21 | -2.03 | -2.03 | -2.49 | -1.87 | -1.83 | -1.76 | -0.92 | -1.28 | -1.97 | -2.52 | -3.47 | -2.37 | -1.64 | -1.56 | -2.78 | -1.47 | -1.06 | -1.71 | -1.07 | -1.67 | -1.60 | -1.63 | -2.10 | -1.25      | -2.44 | 0.47732452 |             |
| Pyruvic Acid    | -0.12 | -1.55 | -0.93 | 0.09  | -1.29 | -0.38 | -1.16 | -1.06 | -0.23 | -1.42 | -1.05 | -1.55 | -0.82 | -0.69 | -1.18 | -1.28 | -0.54 | -0.45 | -1.27 | -0.63 | -0.45 | -1.00 | -1.04 | -1.11 | -2.19 | -0.43 | -0.78 | -0.83 | -0.63 | -2.15 | -0.75 | -0.23 | -1.35      | -0.70 | 0.47799571 |             |
| Arg-Gln         | -0.86 | -0.28 | -0.51 | 0.05  | -1.89 | -0.40 | -1.31 | -0.99 | -1.02 | -1.08 | -1.01 | 0.29  | 0.54  | -0.53 | -0.34 | -0.66 | -1.07 | -1.91 | -0.43 | -3.21 | -0.95 | -0.38 | -1.19 | -0.60 | -0.33 | -0.57 | -0.61 | -0.54 | -0.13 | -0.36 | -0.28 | -0.10 | -0.46      | -1.16 | 0.48153988 |             |
| Pro-Glu         | -3.28 | -2.14 | -3.15 | -2.86 | -3.24 | -2.06 | -2.79 | -3.56 | -2.23 | -2.51 | -2.51 | -3.02 | -3.04 | -2.39 | -1.92 | -2.03 | -2.95 | -3.56 | -3.78 | -3.78 | -3.54 | -3.16 | -2.22 | -2.93 | -3.11 | -2.20 | -2.31 | -3.78 | -2.06 | -2.08 | -1.56 | -2.21 | -2.73      | -3.36 | 0.49054278 |             |
| Pro-Phle        | -3.24 | -2.81 | -2.13 | -1.35 | -2.38 | -2.59 | -2.65 | -2.55 | -1.46 | -1.73 | -1.73 | -2.69 | -1.86 | -1.75 | -1.31 | -1.43 | -1.74 | -2.83 | -3.37 | -3.56 | -3.12 | -2.95 | -1.60 | -2.66 | -1.77 | -1.61 | -1.15 | -1.47 | -1.86 | -1.35 | -2.11 | -2.89 | -1.93      | -2.36 | 0.49335607 |             |
| Raffinose       | -2.04 | -1.82 | -2.99 | -2.04 | -3.01 | -2.70 | -2.91 | -3.58 | -2.15 | -2.76 | -2.15 | -2.58 | -2.15 | -2.15 | -1.46 | -1.74 | -2.51 | -2.99 | -3.32 | -2.90 | -2.72 | -1.33 | -2.57 | -1.99 | -2.79 | -2.12 | -2.24 | -2.23 | -2.21 | -2.23 | -2.23 | -2.23 | -2.23      | -2.23 | 0.49390805 |             |
| Met-Asp         | -3.28 | -2.06 | -2.99 | -2.07 | -3.27 | -2.60 | -2.89 | -3.34 | -1.40 | -2.22 | -2.22 | -2.72 | -2.36 | -2.36 | -2.22 | -1.72 | -1.87 | -2.57 | -3.27 | -3.40 | -3.86 | -3.17 | -3.12 | -1.92 | -2.92 | -2.37 | -2.18 | -2.90 | -2.07 | -1.45 | -1.45 | -3.92 | -1.64      | 2.07  | 0.49456436 |             |
| Leu-Asn         | -1.53 | -1.99 | -2.34 | -1.43 | -3.22 | -2.61 | -1.58 | -2.28 | -1.16 | -1.97 | -1.97 | -2.72 | -2.05 | -1.95 | -1.52 | -0.87 | -1.14 | -1.04 | -2.44 | -2.56 | -3.78 | -2.05 | -1.54 | -1.81 | -2.74 | -1.93 | -1.16 | -1.55 | -1.07 | -1.67 | -1.19 | -1.41 | -2.10      | -1.18 | 2.15       | 0.49461700  |
| Met-Arg         | -1.74 | -1.80 | -2.72 | -1.59 | -3.34 | -2.11 | -2.01 | -2.74 | -1.76 | -2.14 | -2.14 | -2.16 | -2.51 | -2.44 | -2.04 | -1.03 | -1.77 | -1.45 | -2.59 | -2.64 | -3.49 | -1.89 | -1.62 | -1.14 | -2.64 | -2.23 | -1.57 | -1.18 | -1.62 | -1.78 | -1.13 | -1.62 | -2.70      | -1.64 | 3.27       | 0.49521873  |
| Glucose         | 0.49  | -0.17 | -0.13 | 0.72  | 0.38  | 0.80  | 0.82  | 0.20  | 0.25  | 0.51  | 0.08  | 0.95  | 0.32  | 0.41  | 0.51  | 0.85  | 0.84  | 0.94  | 0.31  | 0.97  | 0.78  | 0.38  | 0.91  | 0.52  | 0.45  | 0.58  | -0.05 | -0.55 | 0.35  | 0.20  | -0.31 | 0.30  | -0.27      | 0.83  | 0.50106448 |             |
| Ala-Ala         | -2.74 | -2.15 | -3.00 | -2.26 | -2.92 | -2.40 | -4.06 | -3.02 | -1.58 | -2.36 | -2.24 | -2.83 | -2.33 | -2.30 | -2.32 | -1.41 | -1.29 | -1.89 | -2.30 | -2.90 | -3.01 | -2.71 | -2.21 | -2.62 | -2.92 | -2.48 | -2.27 | -2.31 | -2.31 | -2.18 | -1.45 | -1.83 | -3.32      | -2.56 | 2.22       | 0.50150989  |
| Glutamic Acid   | -2.88 | -1.25 | -2.77 | -2.06 | -3.41 | -2.60 | -2.65 | -3.37 | -1.98 | -2.08 | -3.13 | -2.33 | -2.47 | -2.50 | -2.45 | -2.51 | -2.82 | -3.20 | -2.93 | -3.46 | -3.02 | -2.89 | -1.63 | -2.89 | -1.86 | -3.05 | -1.20 | -1.97 | -2.53 | -1.43 | -1.23 | -1.95 | -2.27      | 2.86  | 0.50456088 |             |
| Pro-Glu         | -3.04 | -1.78 | -2.52 | -1.79 | -3.54 | -2.27 | -4.47 | -3.34 | -0.99 | -2.02 | -2.02 | -2.87 | -2.50 | -2.48 | -2.98 | -2.23 | -2.47 | -2.65 | -3.56 | -3.12 | -3.88 | -3.05 | -2.95 | -1.63 | -2.88 | -1.84 | -1.94 | -1.36 | -1.32 | -1.93 | -1.67 | -0.99 | -3.61      | -2.15 | 3.12       | 0.50485060  |
| Arg-Met         | -2.00 | -2.48 | -2.59 | -1.82 | -3.47 | -2.71 | -2.66 | -3.01 | -1.82 | -2.68 | -2.42 | -2.95 | -2.40 | -2.39 | -2.22 | -1.66 | -1.98 | -2.20 | -3.15 | -3.38 | -3.76 | -3.17 | -3.01 | -1.60 | -2.84 | -2.22 | -2.02 | -1.67 | -2.16 | -2.65 | -1.71 | -2.67 | -2.34      | 2.74  | 0.52213618 |             |
| Arg-Glu         | -1.86 | -1.80 | -2.84 | -3.04 | -3.08 | -2.79 | -2.89 | -3.57 | -1.34 | -2.03 | -1.93 | -2.41 | -1.63 | -2.08 | -1.92 | -1.36 | -1.59 | -2.37 | -3.08 | -3.18 | -3.37 | -1.99 | -1.46 | -2.40 | -2.20 | -2.60 | -2.31 | -1.16 | -2.93 | -2.06 | -1.07 | -1.29 | -3.90      | -2.29 | 1.92       | 0.52894056  |
| Ala-Leu         | -1.48 | -2.04 | -2.56 | -1.58 | -3.31 | -1.83 | -1.84 | -2.51 | -1.54 | -2.09 | -2.15 | -2.70 | -2.18 | -2.18 | -1.82 | -0.87 | -1.15 | -1.01 | -2.51 | -2.01 | -2.79 | -2.16 | -1.60 | -1.45 | -2.71 | -1.96 | -1.09 | -0.86 | -1.33 | -1.06 | -1.71 | -2.01 | -4.27      | -1.39 | 2.26       | 0.54280607  |
| Isoleucine      | -2.73 | -1.97 | -2.76 | -2.81 | -3.37 | -2.46 | -2.49 | -3.61 | -3.00 | -2.05 | -1.95 | -2.29 | -2.03 | -1.72 | -1.87 | -1    |       |       |       |       |       |       |       |       |       |       |       |       |       |       |       |       |            |       |            |             |
